# Supplementary figures and images for: Coupling between fast and slow oscillator circuits in Cancer borealis is temperature-compensated
Source: eLife journal article supplement (doi:10.7554/elife.60454), 2021-02-04

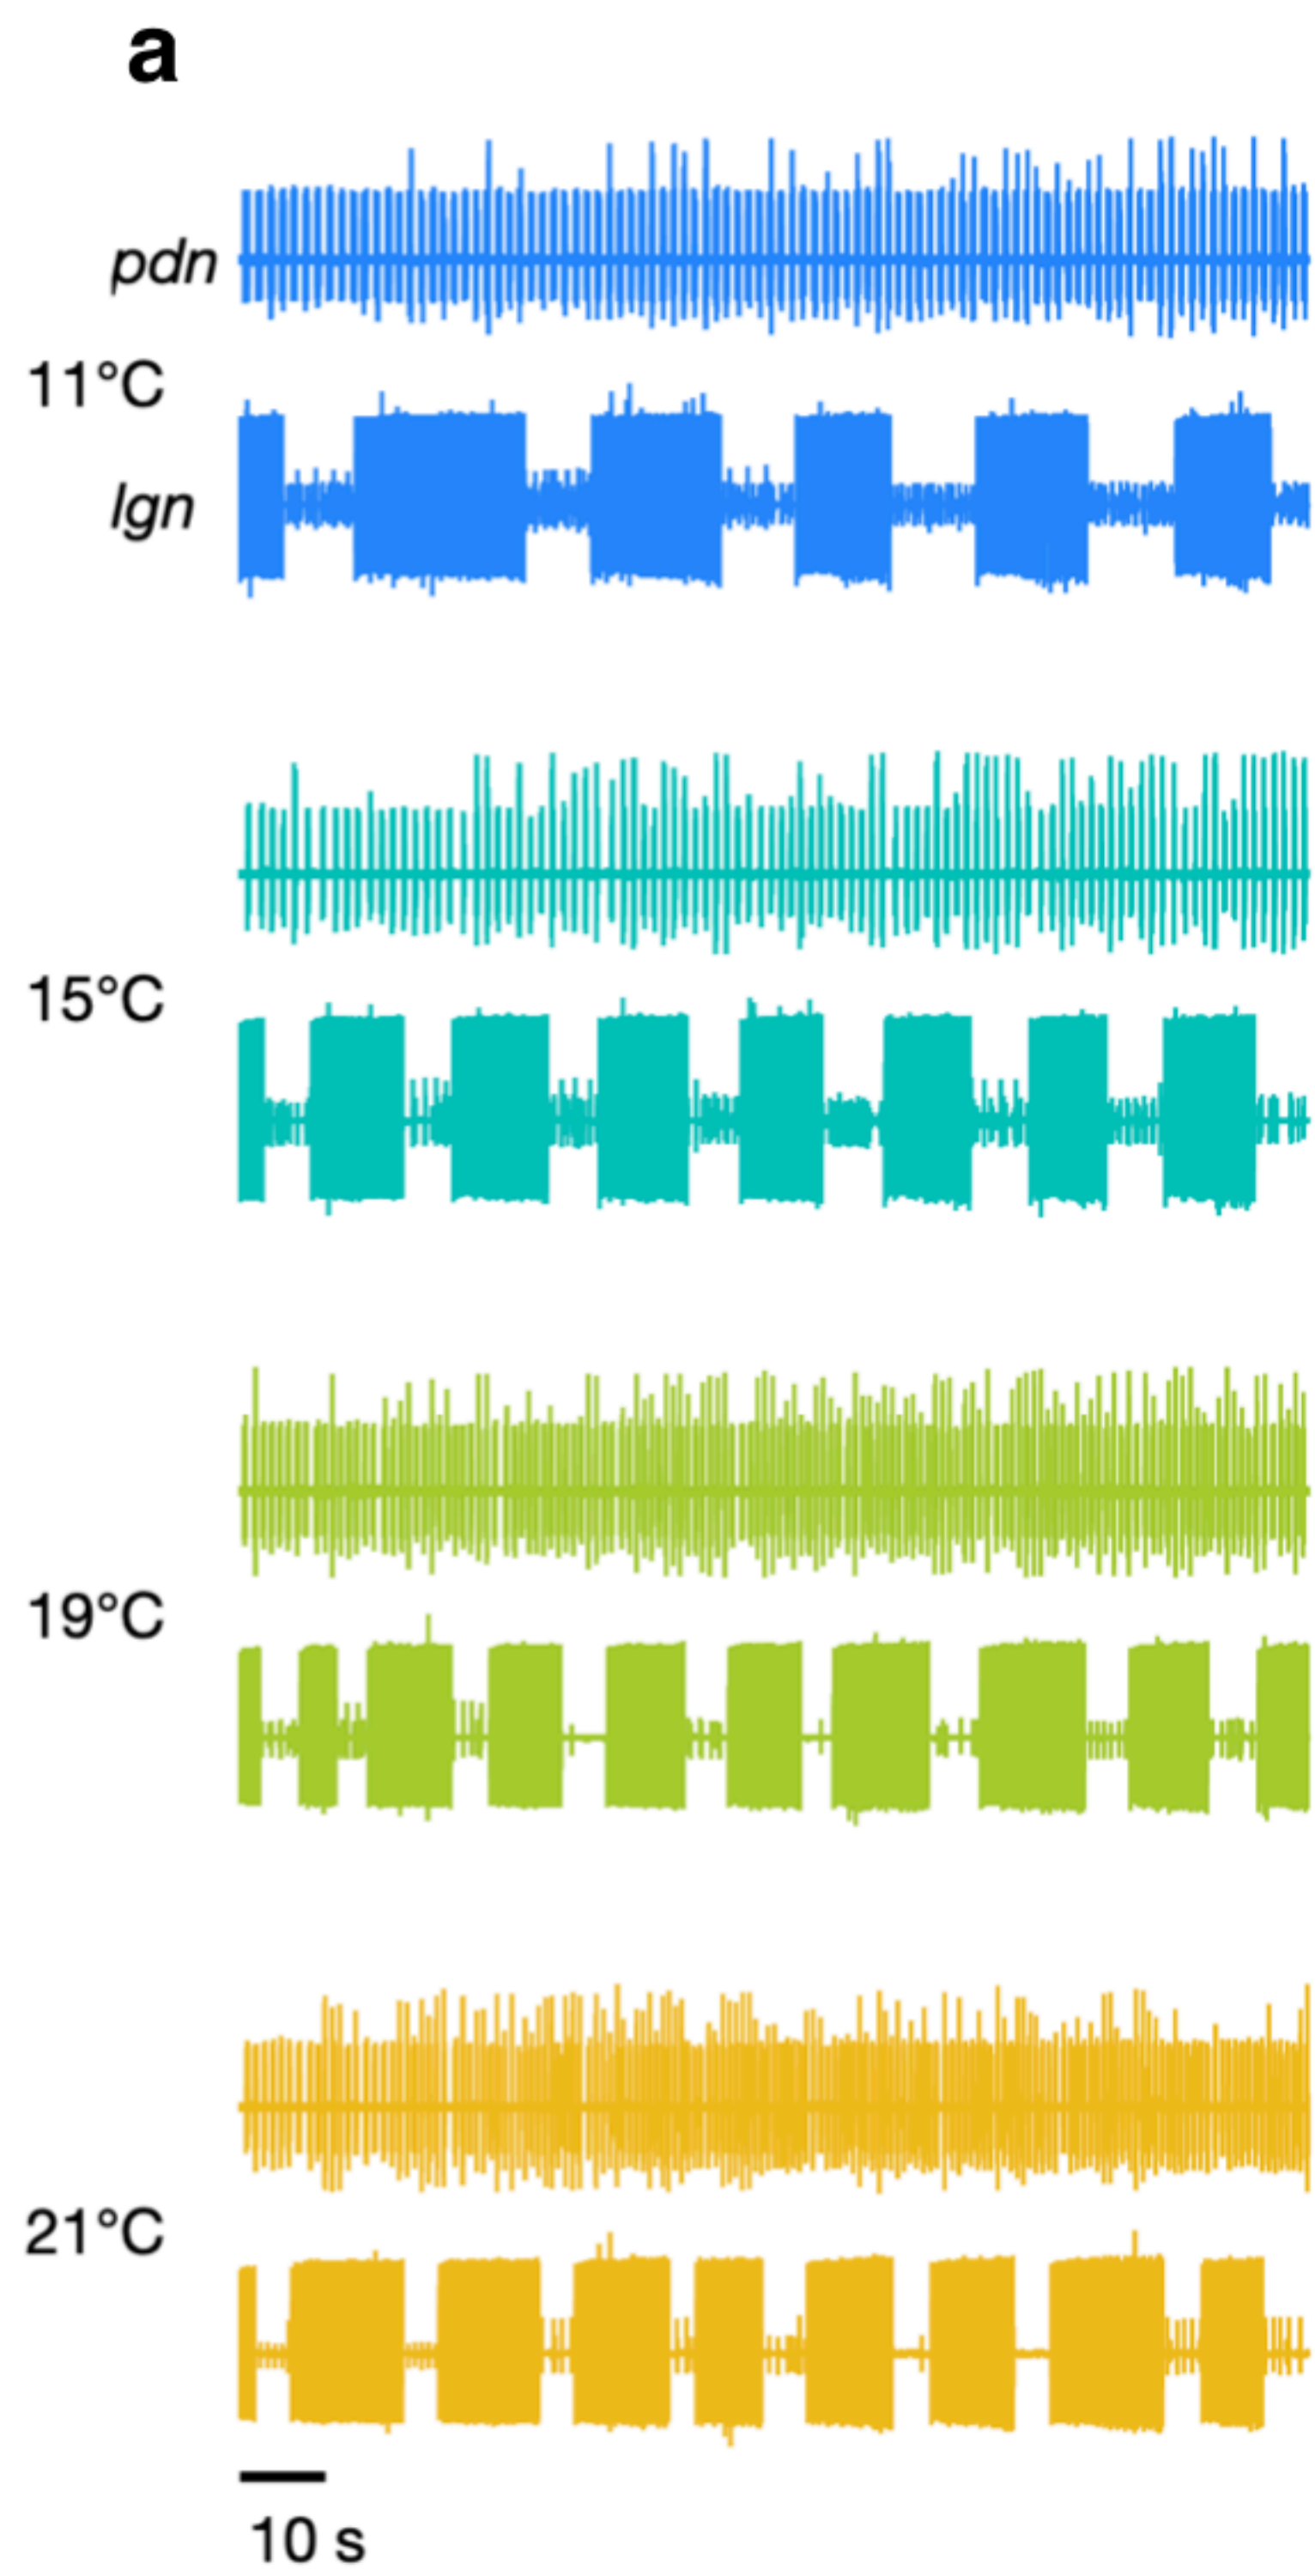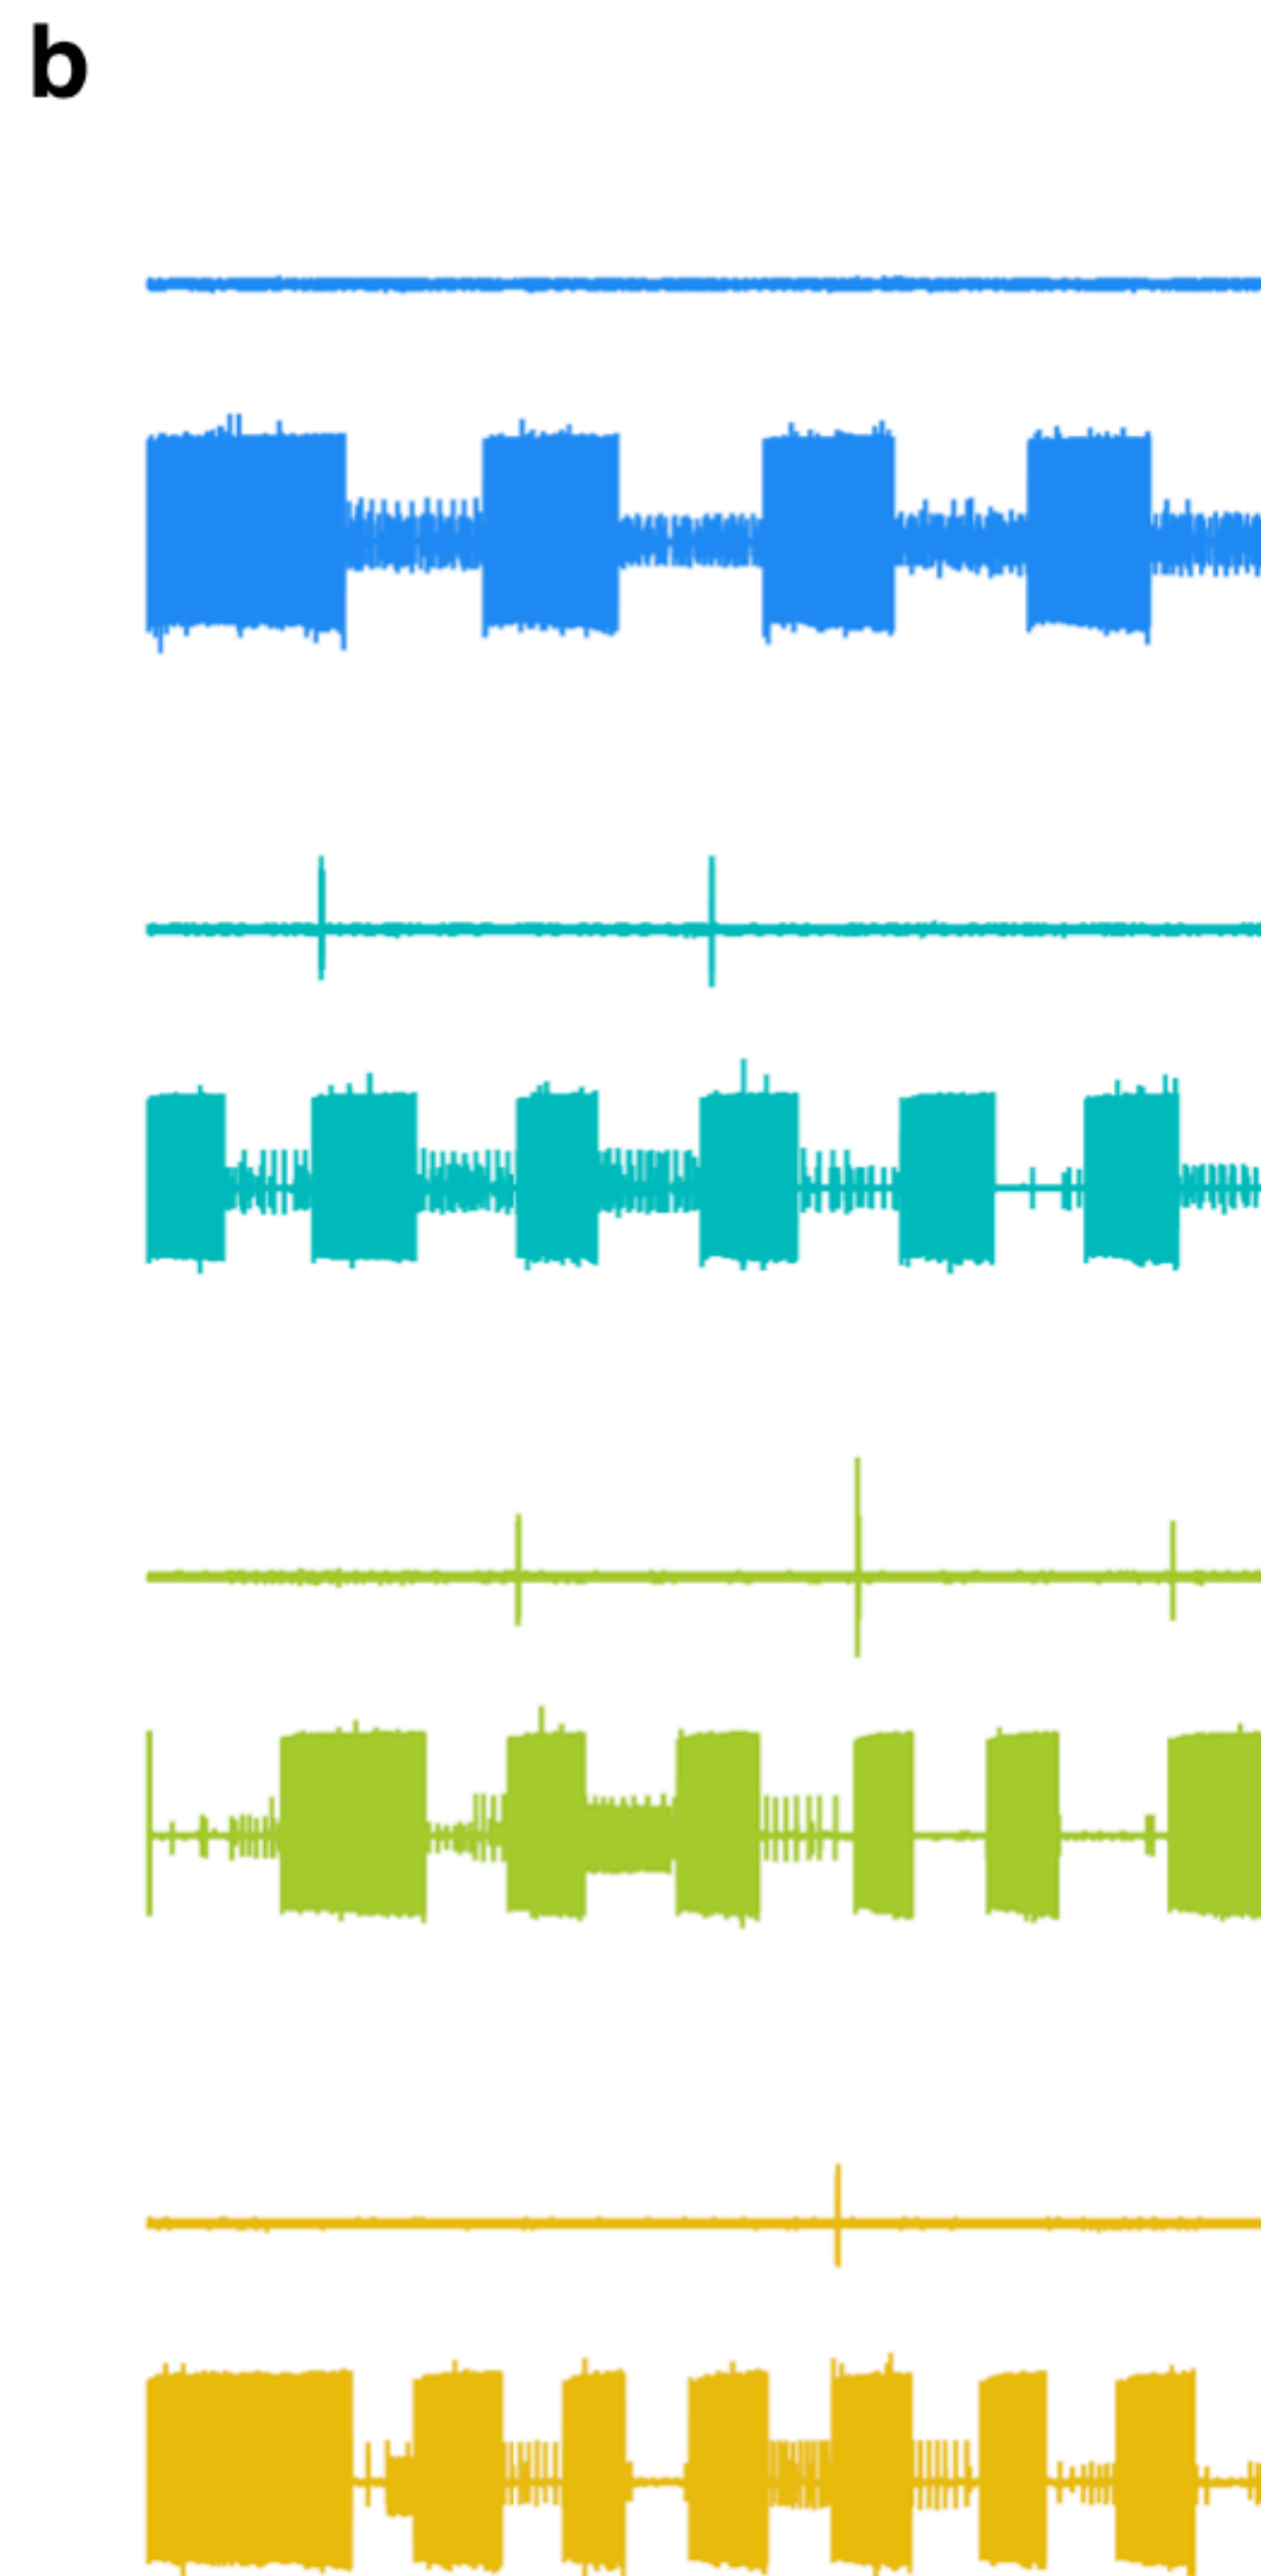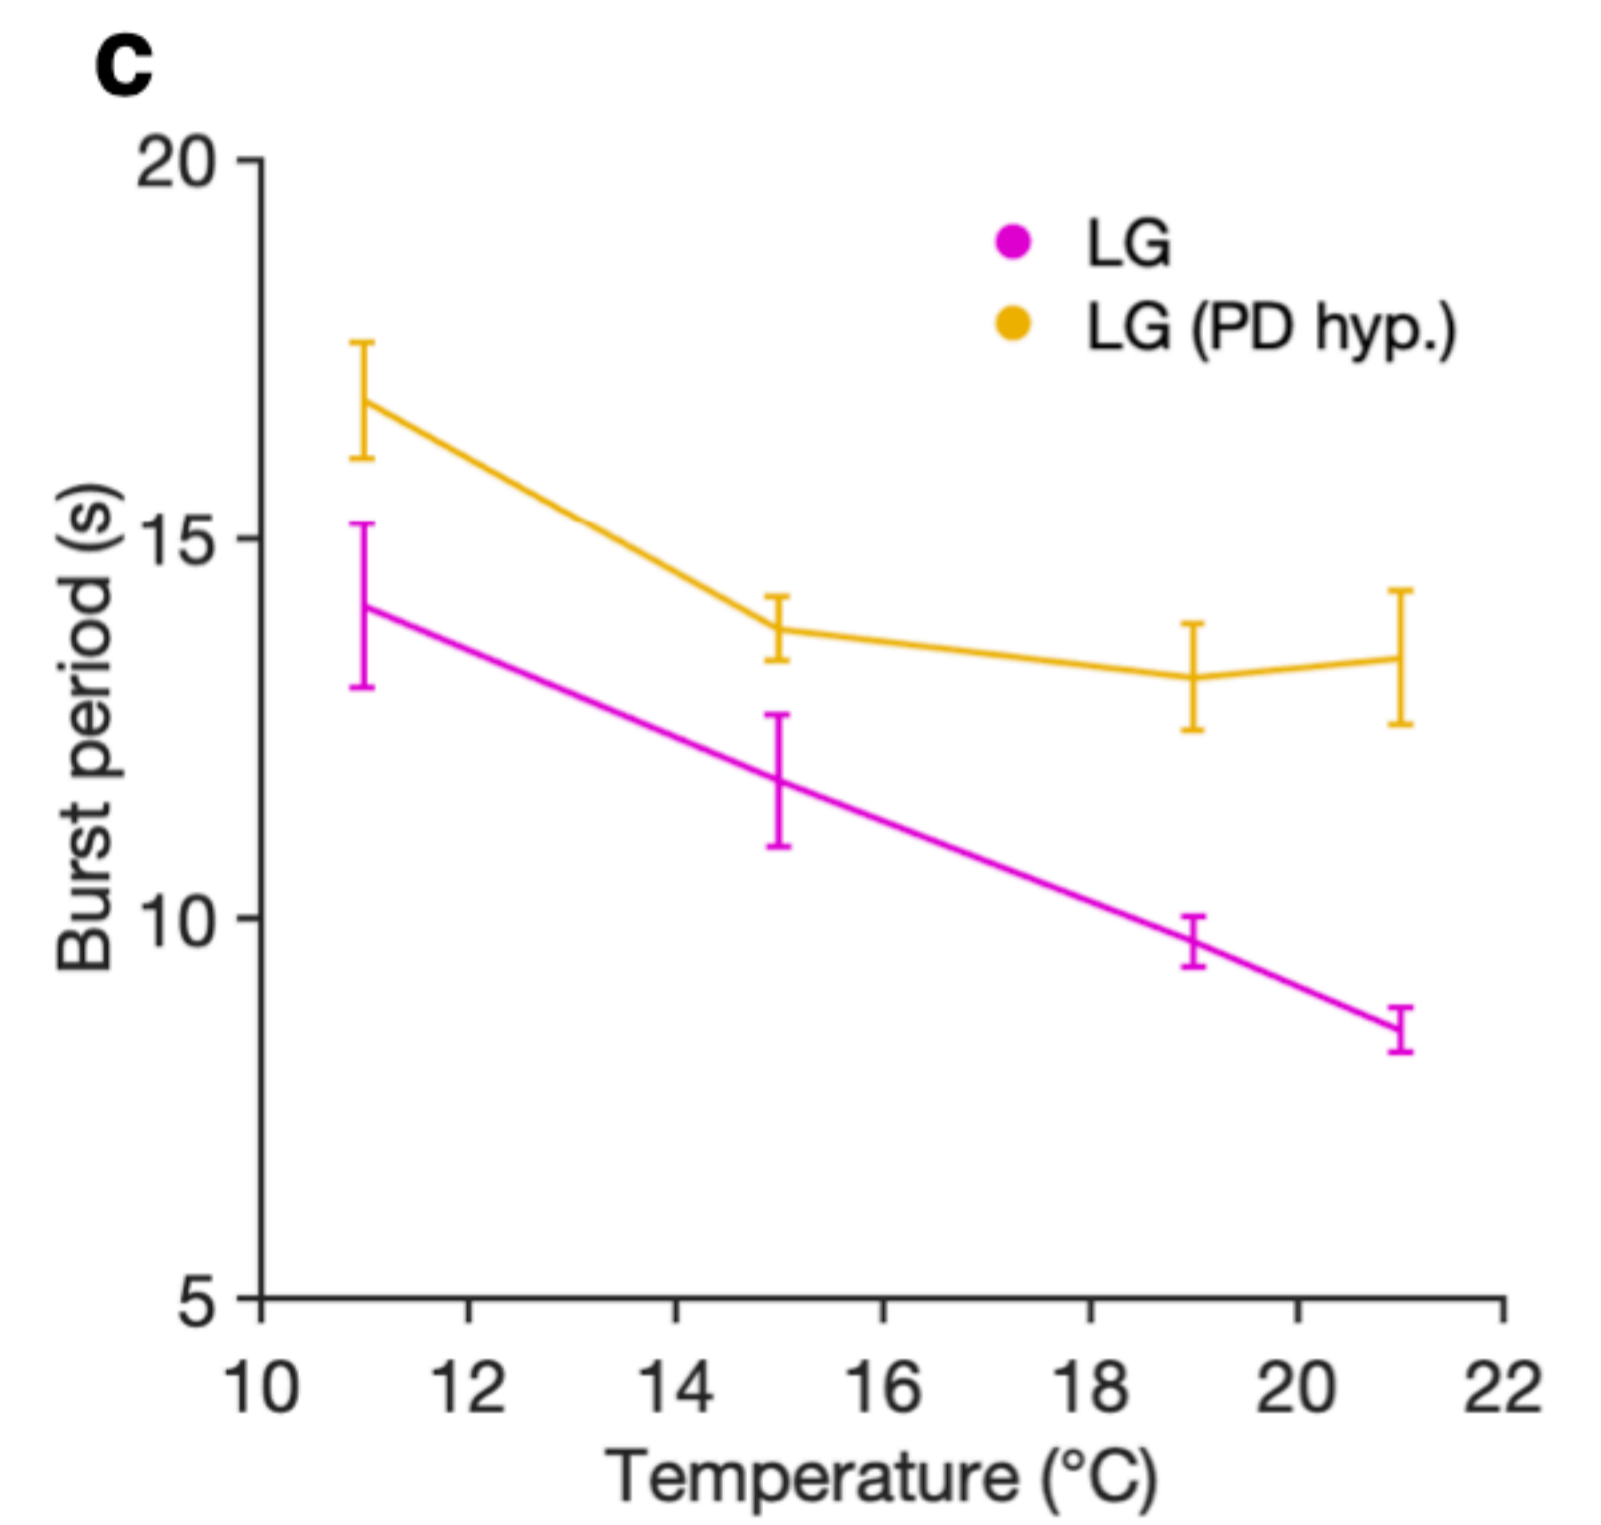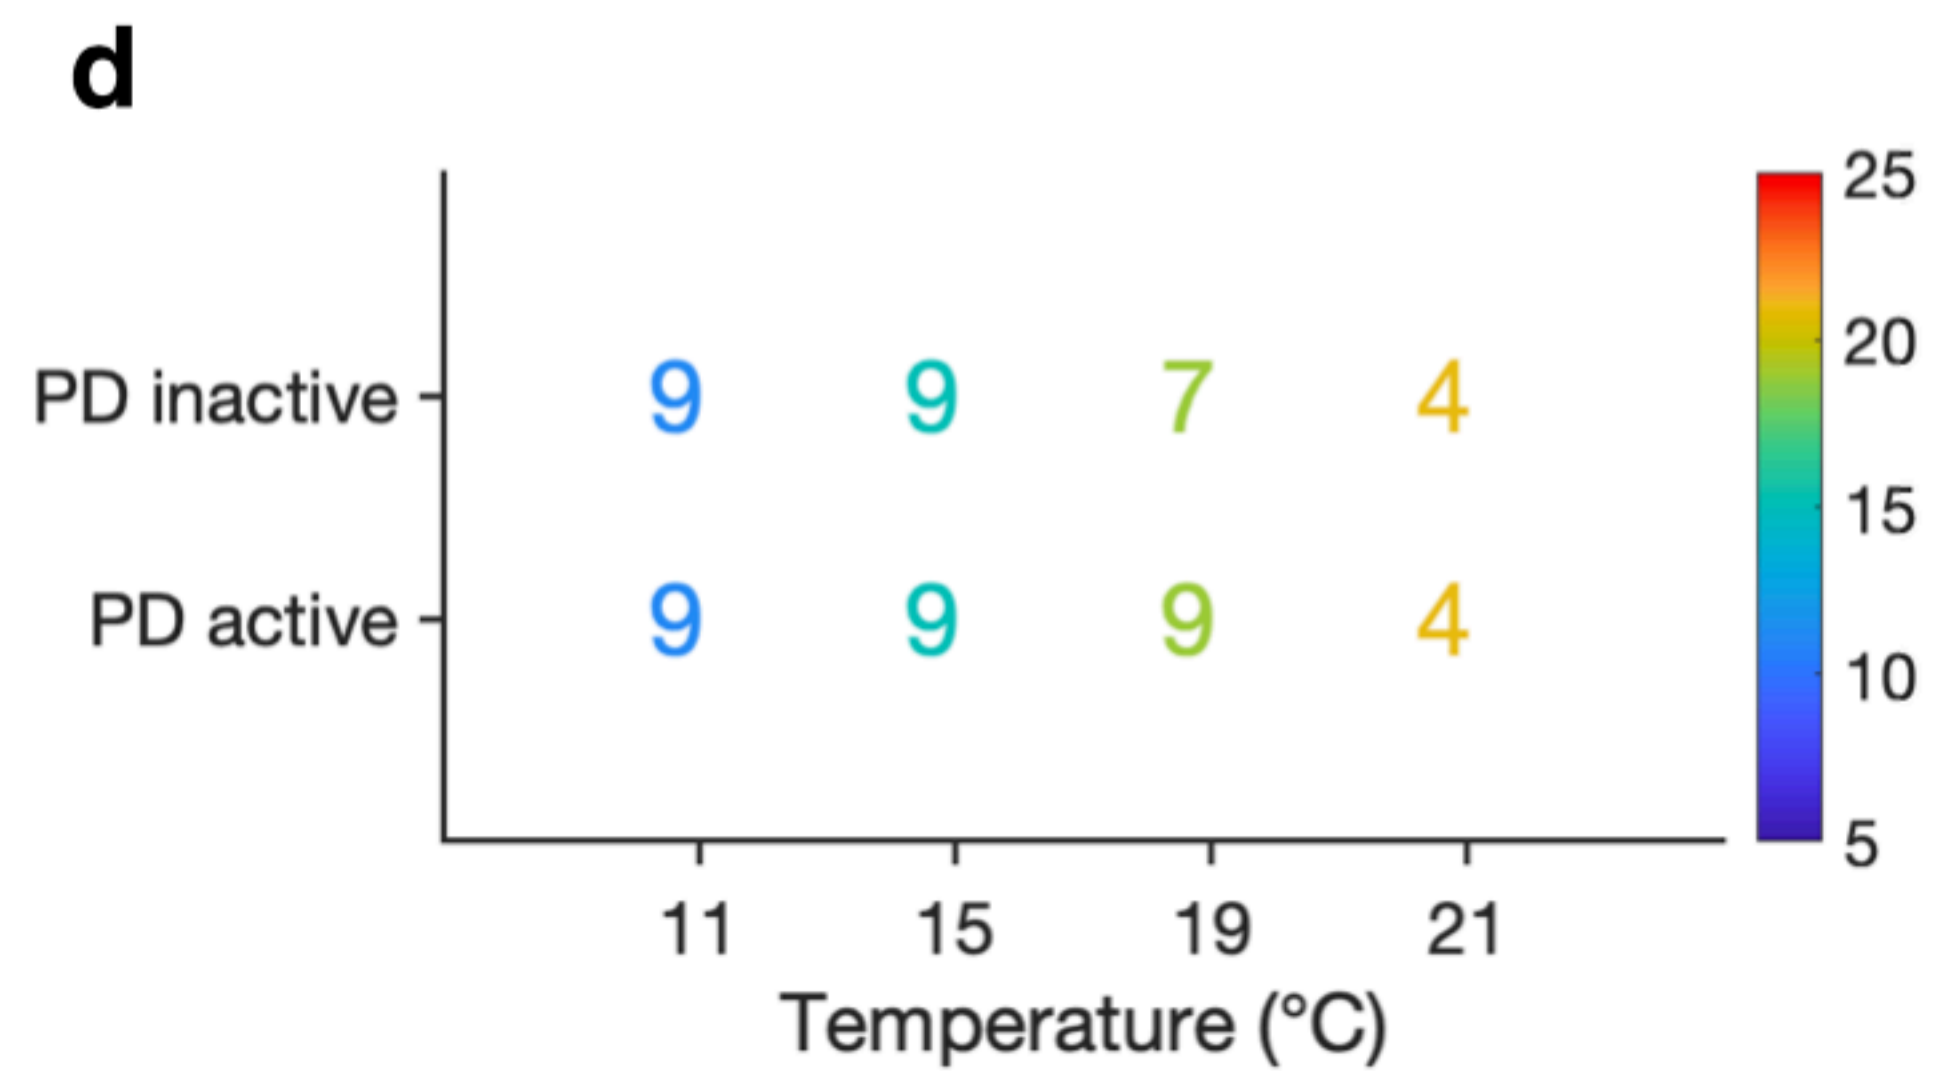

Supplement: supp [file elife-60454-supp-v1.zip]

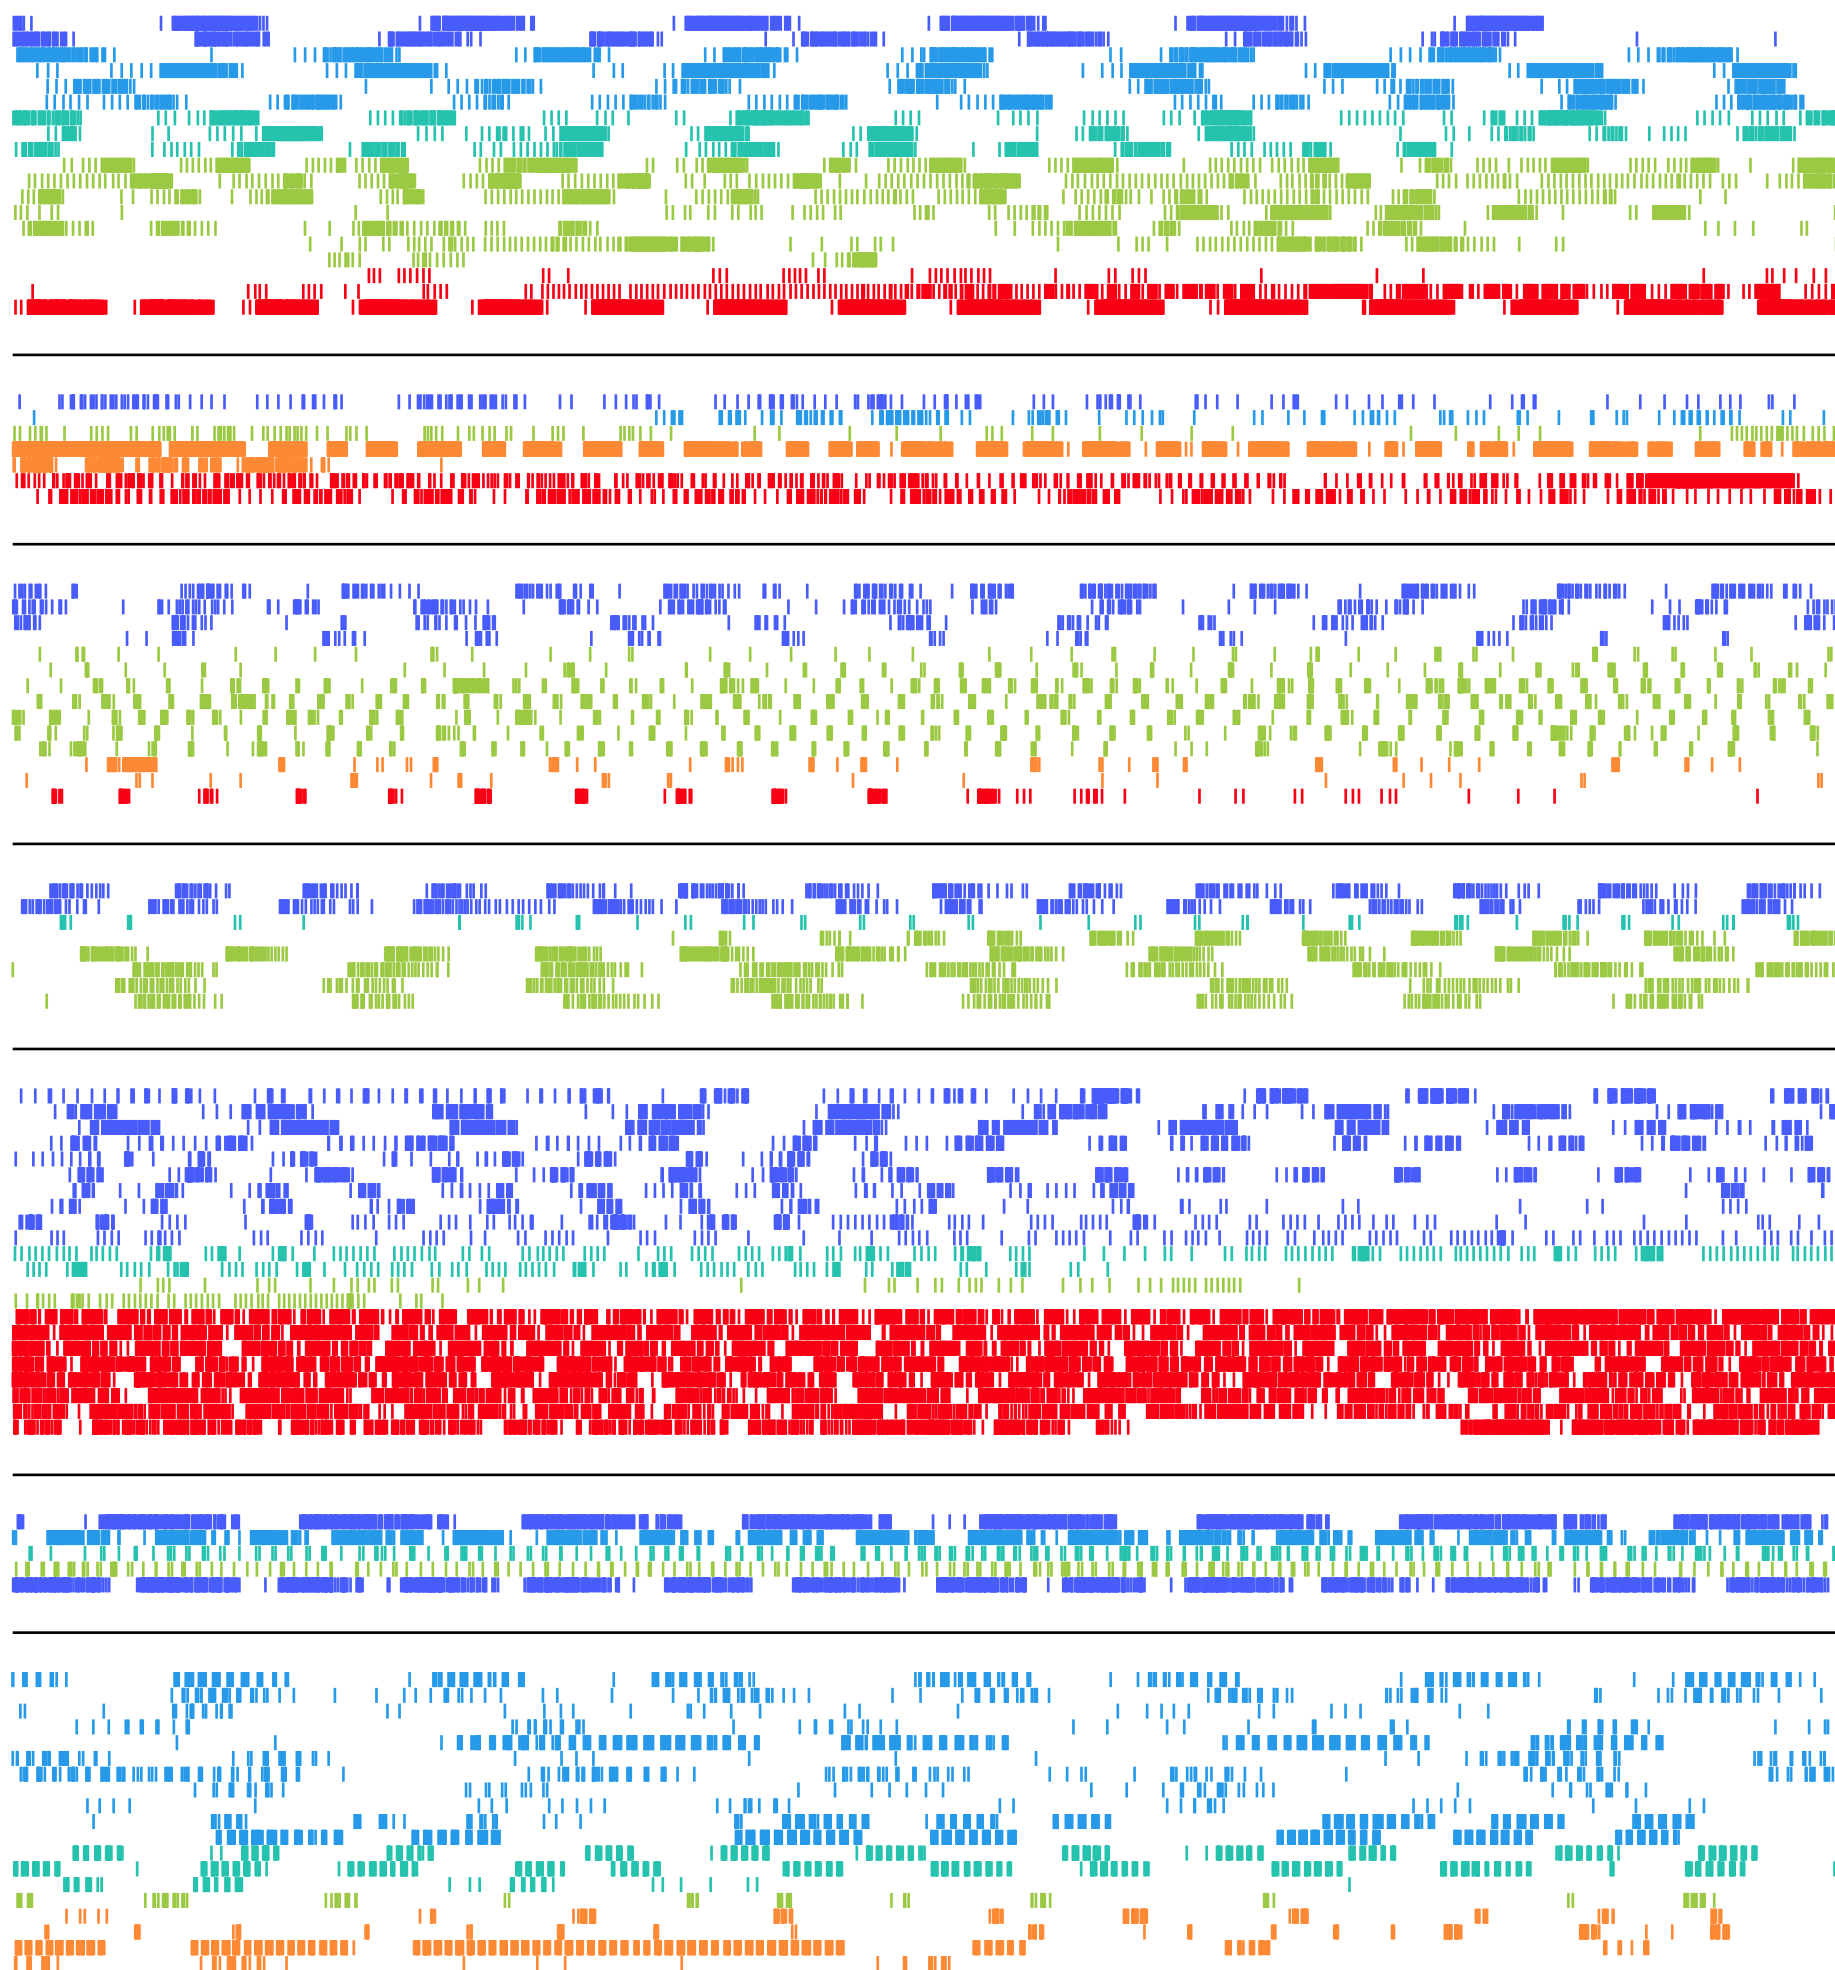

Temperature (°C)

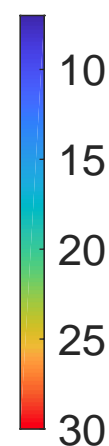

10s

Supplement: supp [file elife-60454-supp-v1.zip]

**a****One preparation**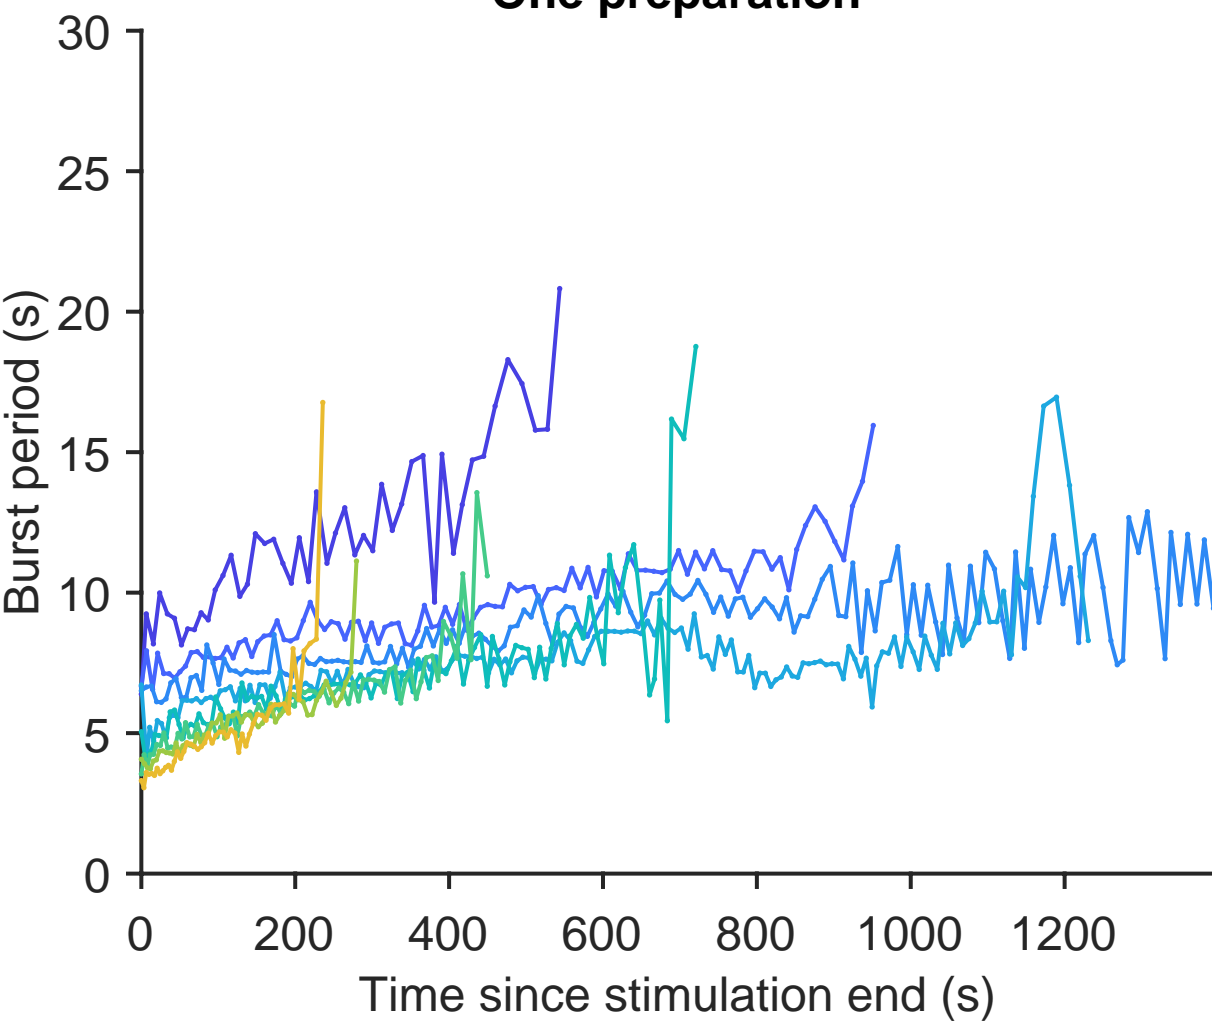**b****All preparations**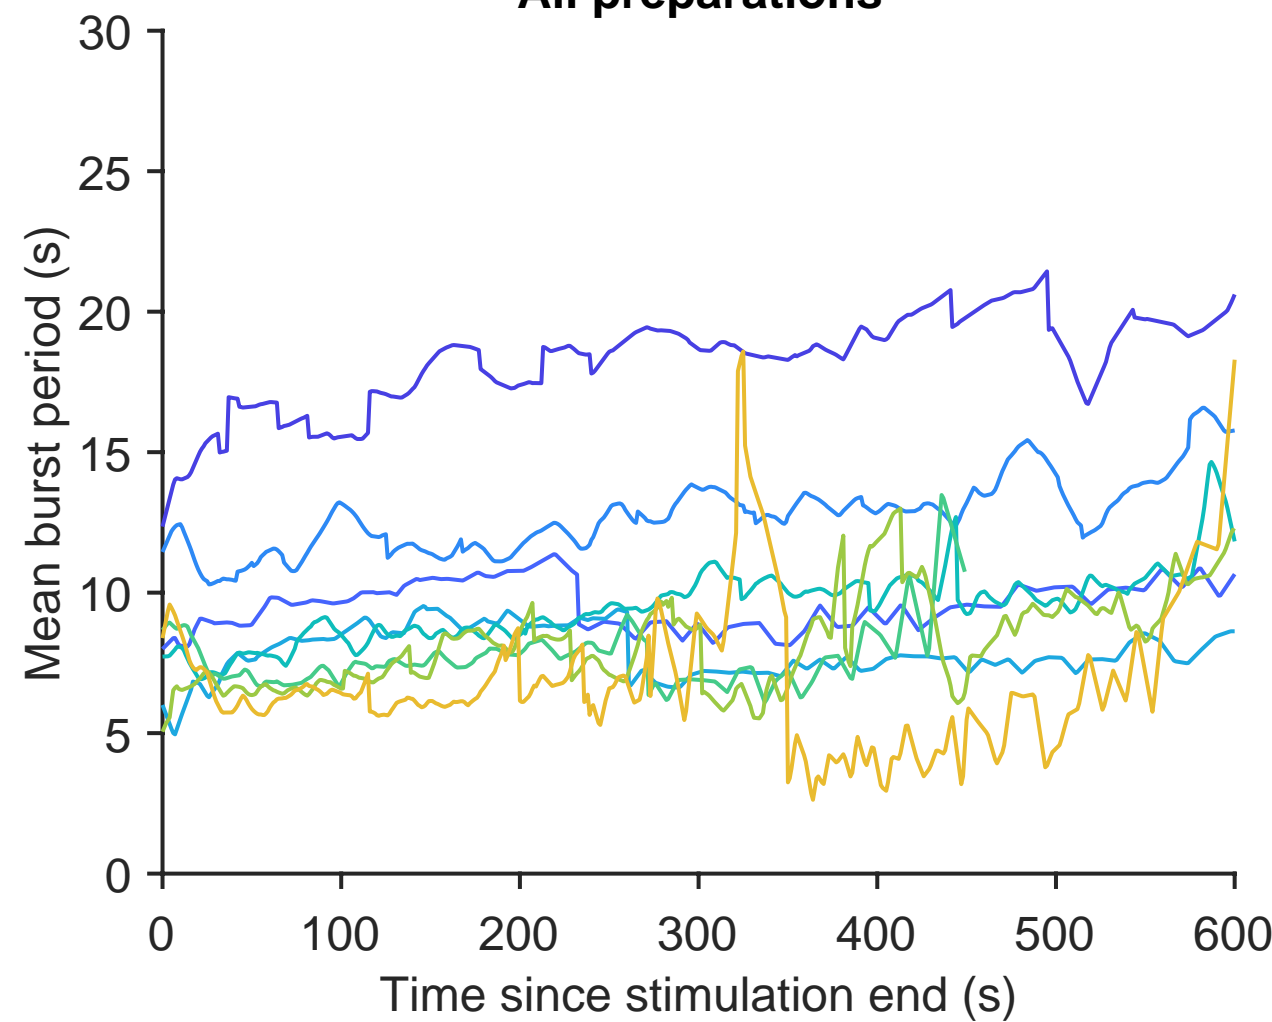**c**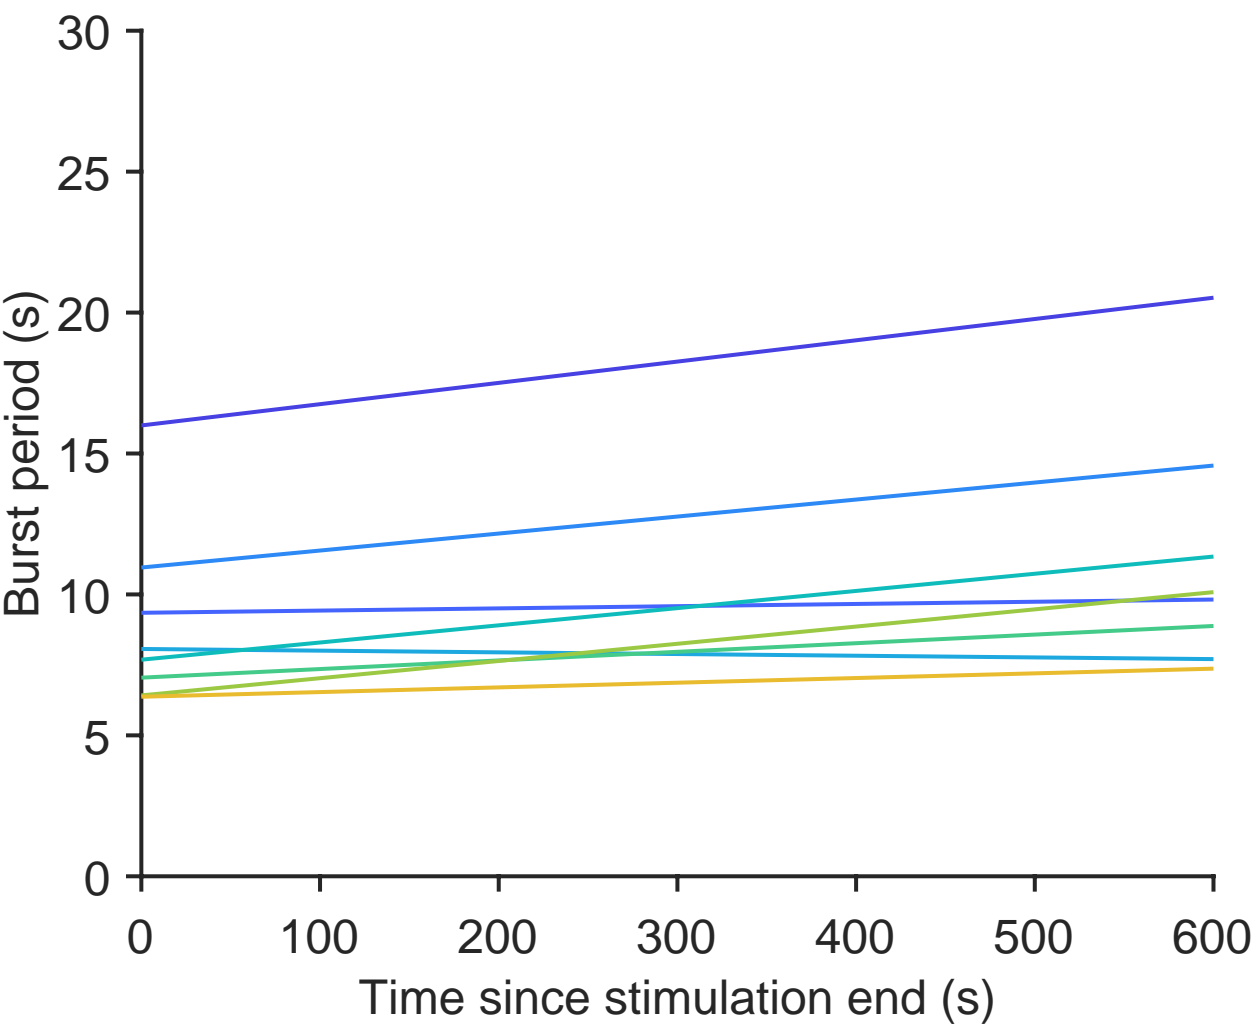**d**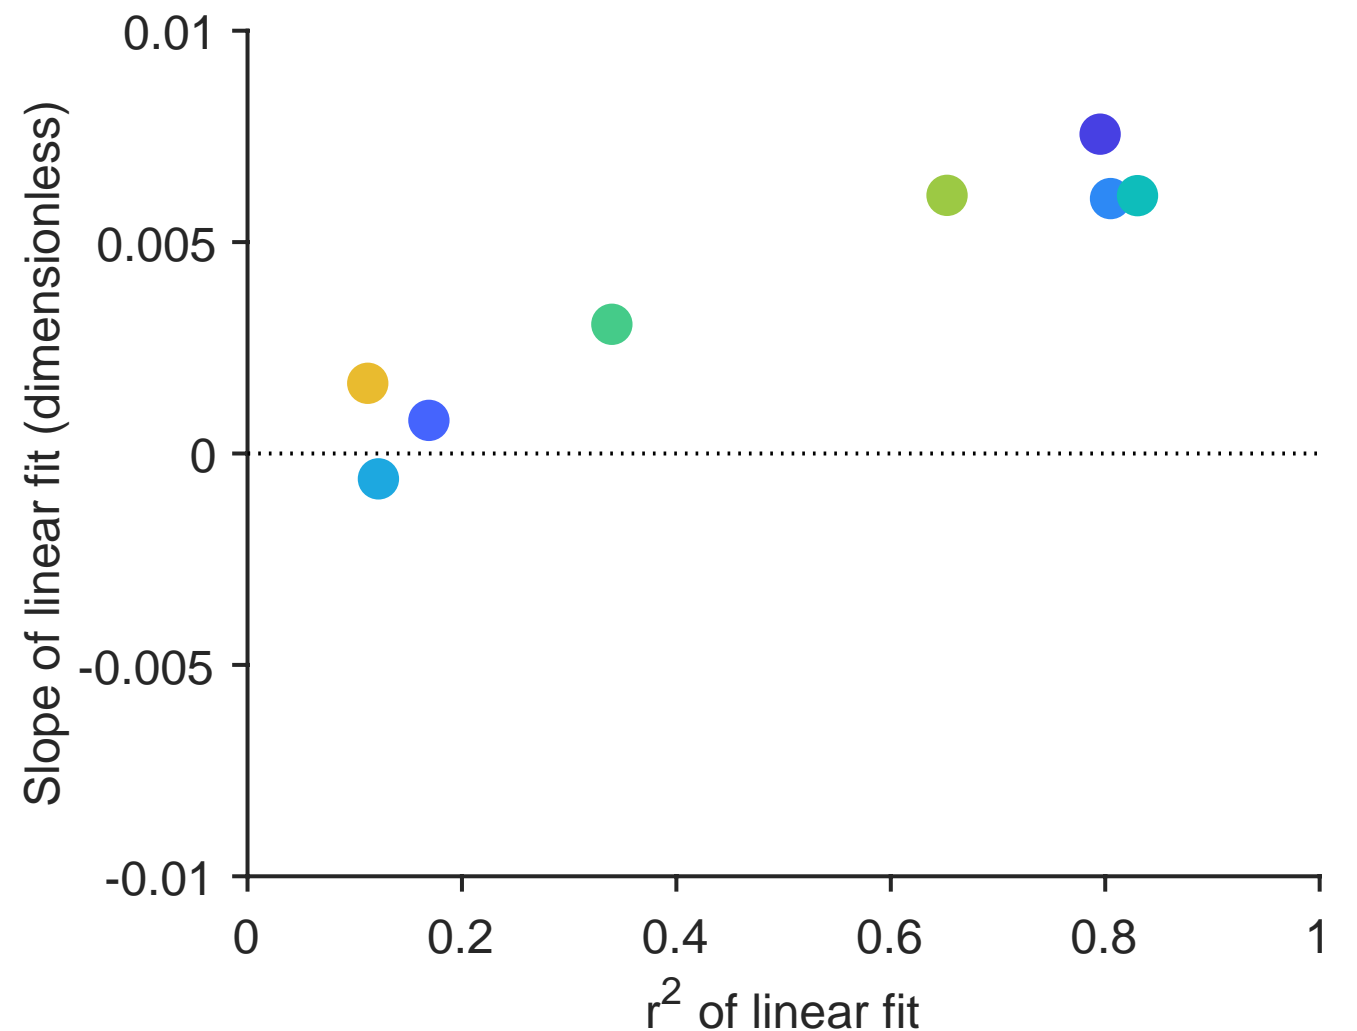

Supplement: supp [file elife-60454-supp-v1.zip]

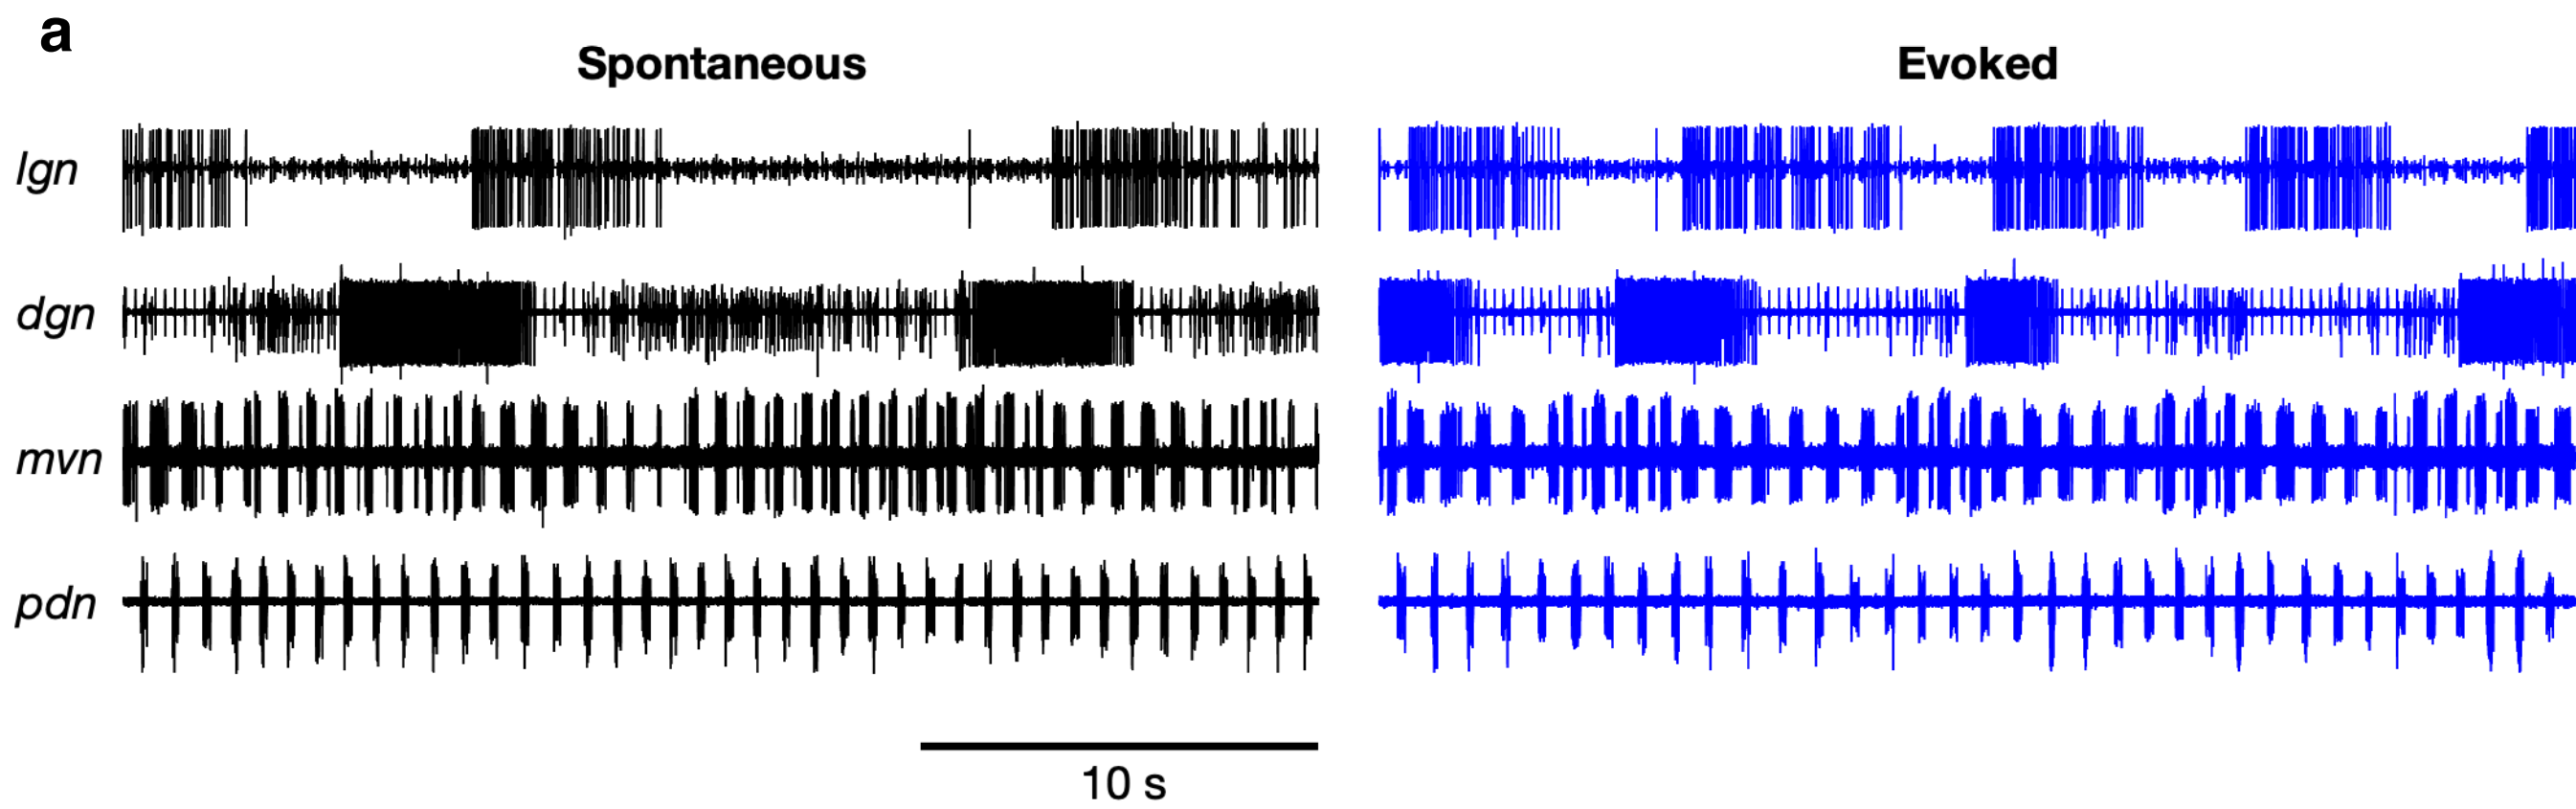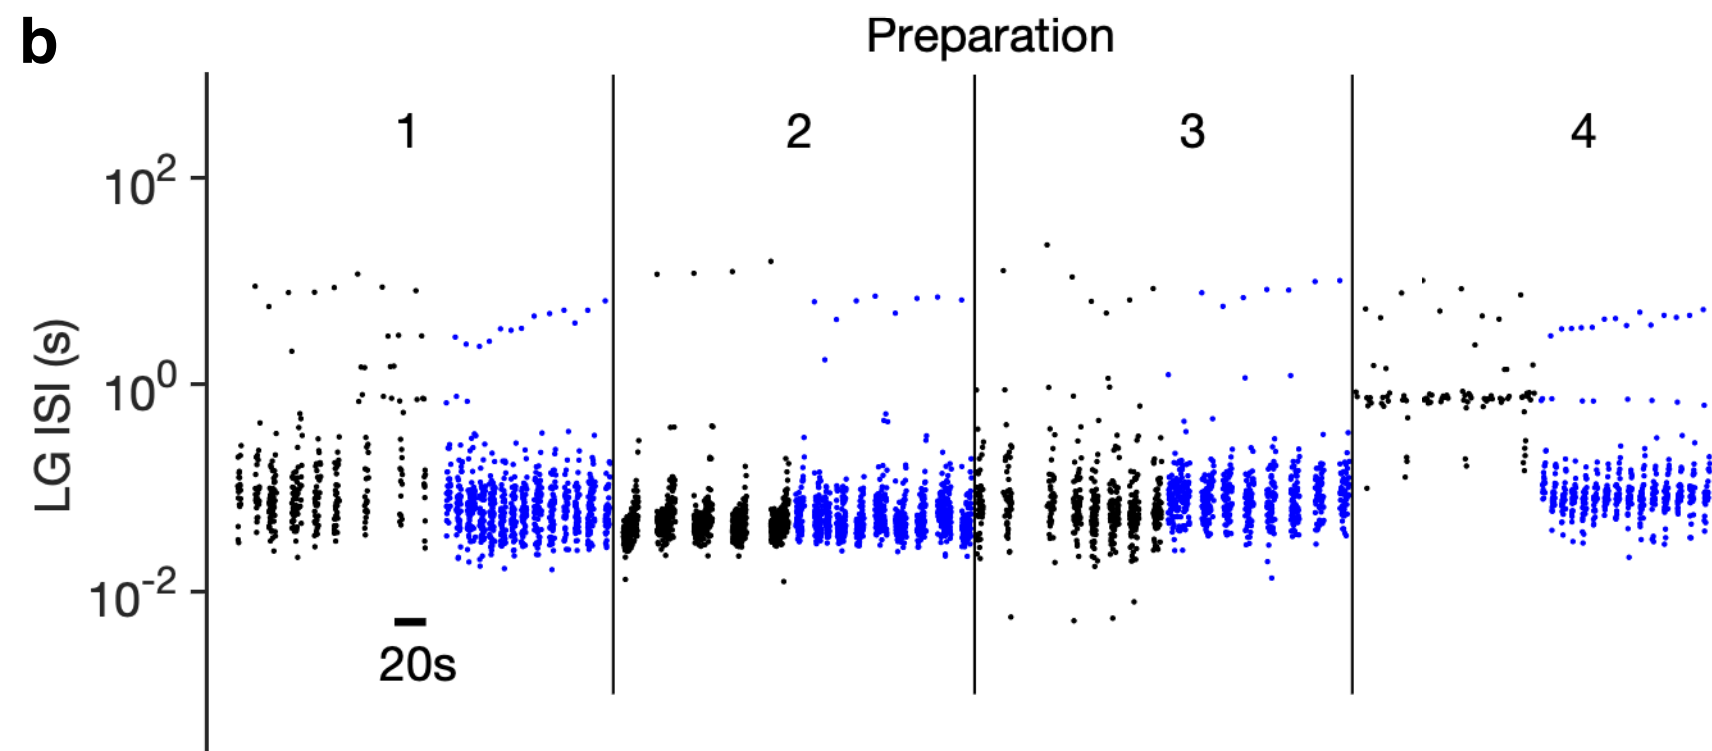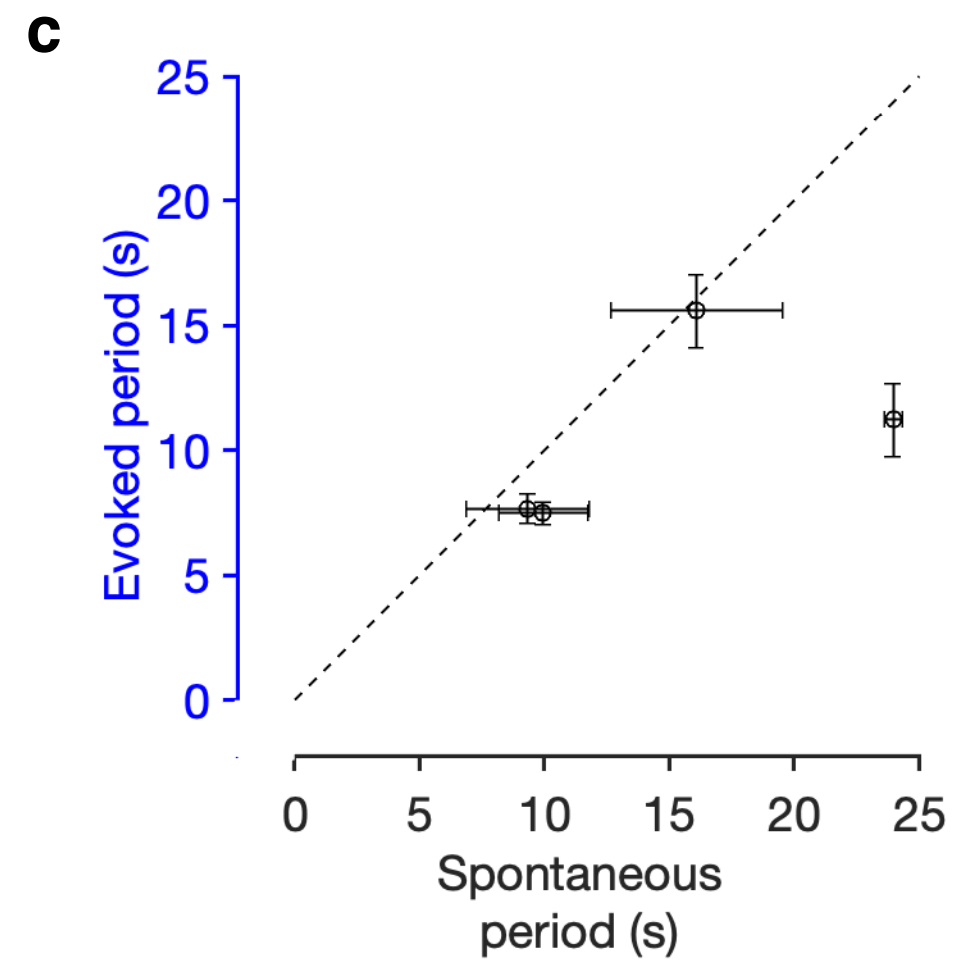

Supplement: supp [file elife-60454-supp-v1.zip]
